# Supplementary material for: Lipidomics of Thalassiosira pseudonana under Phosphorus Stress Reveal Underlying Phospholipid Substitution Dynamics and Novel Diglycosylceramide Substitutes
Source: PubMed Central journal article supplement (PMC5835749; doi:10.1128/aem.02034-17), 2018-03-01
Supplement: AEM.02034-17_zam006188368s1.pdf [file AEM.02034-17_zam006188368s1.pdf]

1 **Lipidomics of *Thalassiosira pseudonana* Under Phosphorus Stress Reveal Underlying**  
2 **Phospholipid Substitution Dynamics and Novel Diglycosylceramide Substitutes**

3 **SUPPLEMENTARY MATERIALS**

4 Running Title: P Stressed Diatom Lipids

5

6 Jonathan E. Hunter<sup>1,2†</sup>, Joost Brandsma<sup>3</sup>, Marcus K. Dymond<sup>4</sup>, Grielof Koster<sup>3</sup>, C. Mark  
7 Moore<sup>1</sup>, Anthony D. Postle<sup>3</sup>, Rachel A. Mills<sup>1</sup> and George S. Attard<sup>5</sup>.

8 1. Ocean and Earth Science, University of Southampton, National Oceanography Centre  
9 Southampton, European Way, Southampton, SO14 3ZH, United Kingdom

10 2. Institute for Life Sciences, University of Southampton, SO17 1BJ, United Kingdom

11 3. Faculty of Medicine, University of Southampton, Southampton General Hospital,  
12 Tremona Road, Southampton, SO16 6YD, United Kingdom

13 4. Division of Chemistry, School of Pharmacy and Biomolecular Sciences, University of  
14 Brighton, Brighton, BN2 4GJ, United Kingdom

15 5. Chemistry, University of Southampton, Southampton, SO17 1BJ, United Kingdom

16

17

18

19 †Corresponding Author: [jhunter@whoi.edu](mailto:jhunter@whoi.edu); Current Address: Woods Hole Oceanographic  
20 Institution, Woods Hole, MA 02543-1050, United States of America

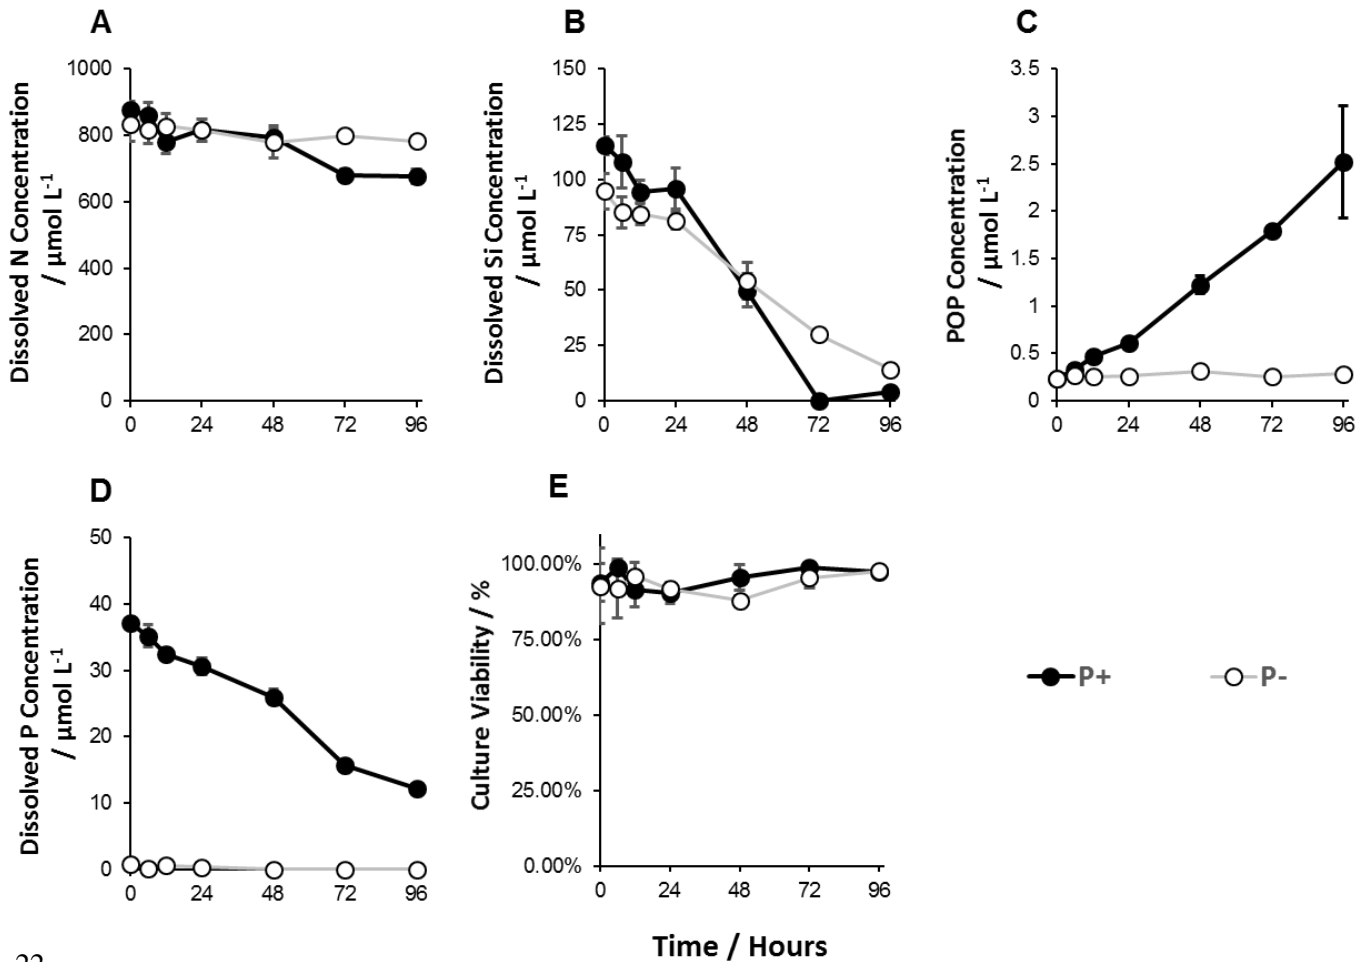

22

23 *Supplementary Figure 1 - Macronutrient concentrations in the cultures through time.*  
 24 *Dissolved phosphorus concentration in the growth media (A); dissolved silicon concentration*  
 25 *in the growth media (B); particulate organic phosphorus concentration per litre growth*  
 26 *media (C); dissolved phosphorus concentration in the growth media (D) and percentage*  
 27 *viability of the *T. pseudonana* cells in culture (E). Data include P+ and P- conditions, with*  
 28 *the progression of time. Data are the mean of  $n = 3$  biological replicates, with error bars of 1*  
 29 *standard deviation.*

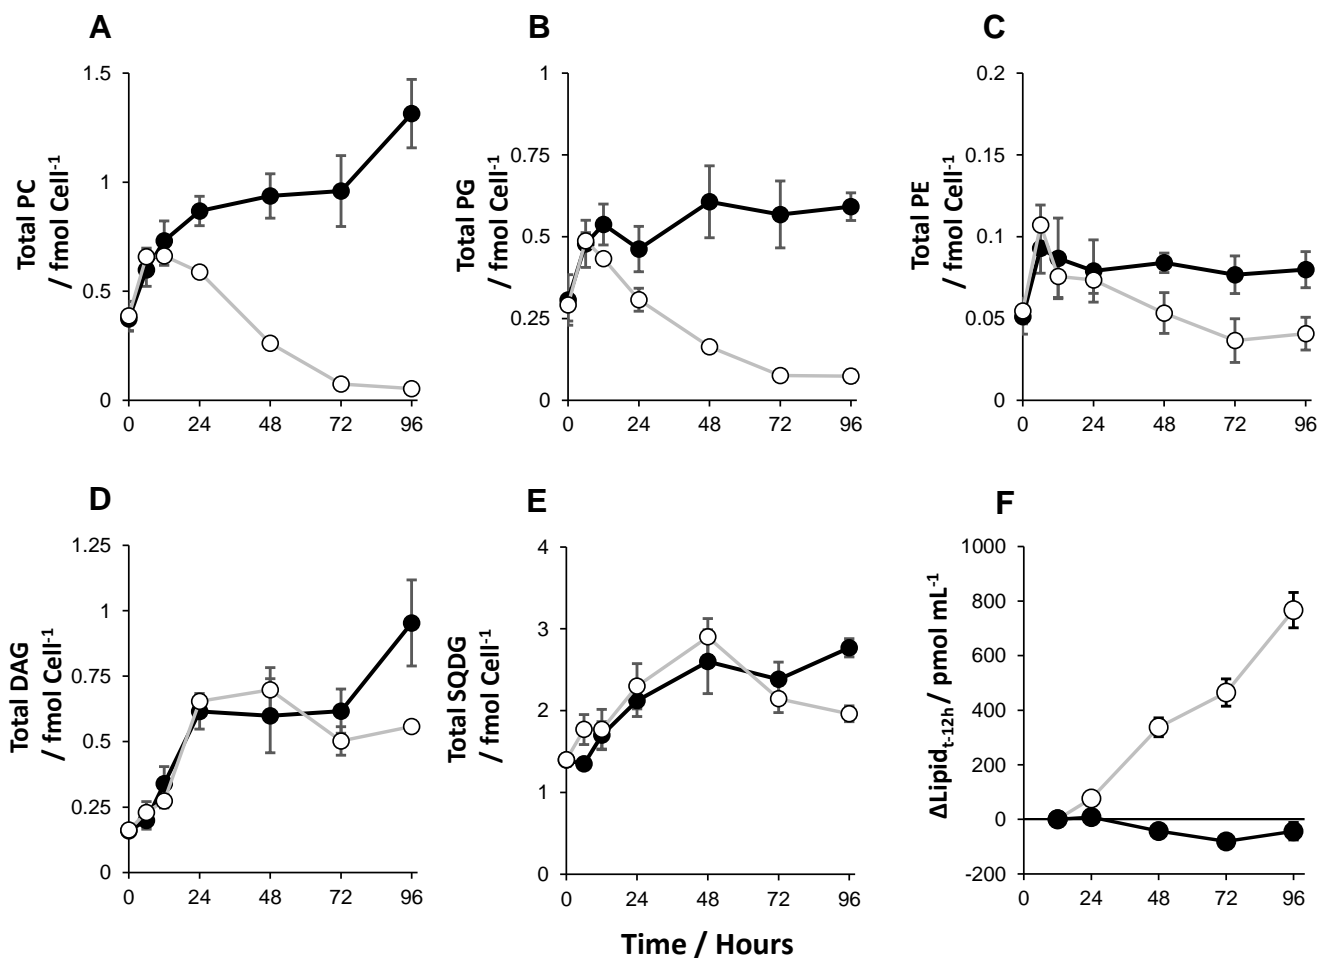

30

Panel:      ●—P+      ○—P-      Panel F Only   ●—Total PL   ○—DGCC

31 *Supplementary Figure 2 – Total glycerophosphatidylcholine (PC, A), total*  
 32 *glycerophosphatidylglycerol (PG, B), total glycerophosphatidylethanolamine (PE, C), total*  
 33 *diacylglycerol (DAG, D) and total sulfoquinovosyldiacylglycerol (SQDG, E) per cell under*  
 34 *P+ and P- conditions, with the progression of time. Panel (F) depicts the change in total*  
 35 *lipid quantity (total phospholipid (P-Lipid) and DGCC) per mL culture (Lipid<sub>t-12h</sub>), between*  
 36 *time t and 12 h, in the P- cultures (A). y < 0 indicates a net degradation and loss of the total*  
 37 *phospholipids, y = 0 indicates a constant quantity (no net synthesis or degradation), y > 0*  
 38 *indicates biosynthesis and net increase in total lipid quantity. Values are relative to 12 h,*  
 39 *observed as the initiation of P stress and consequently DGCC biosynthesis and P-Lipid*

40 *substitution/degradation in the P- cultures. Data are the mean of  $n = 3$  biological replicates,*  
41 *with error bars of 1 standard deviation.*

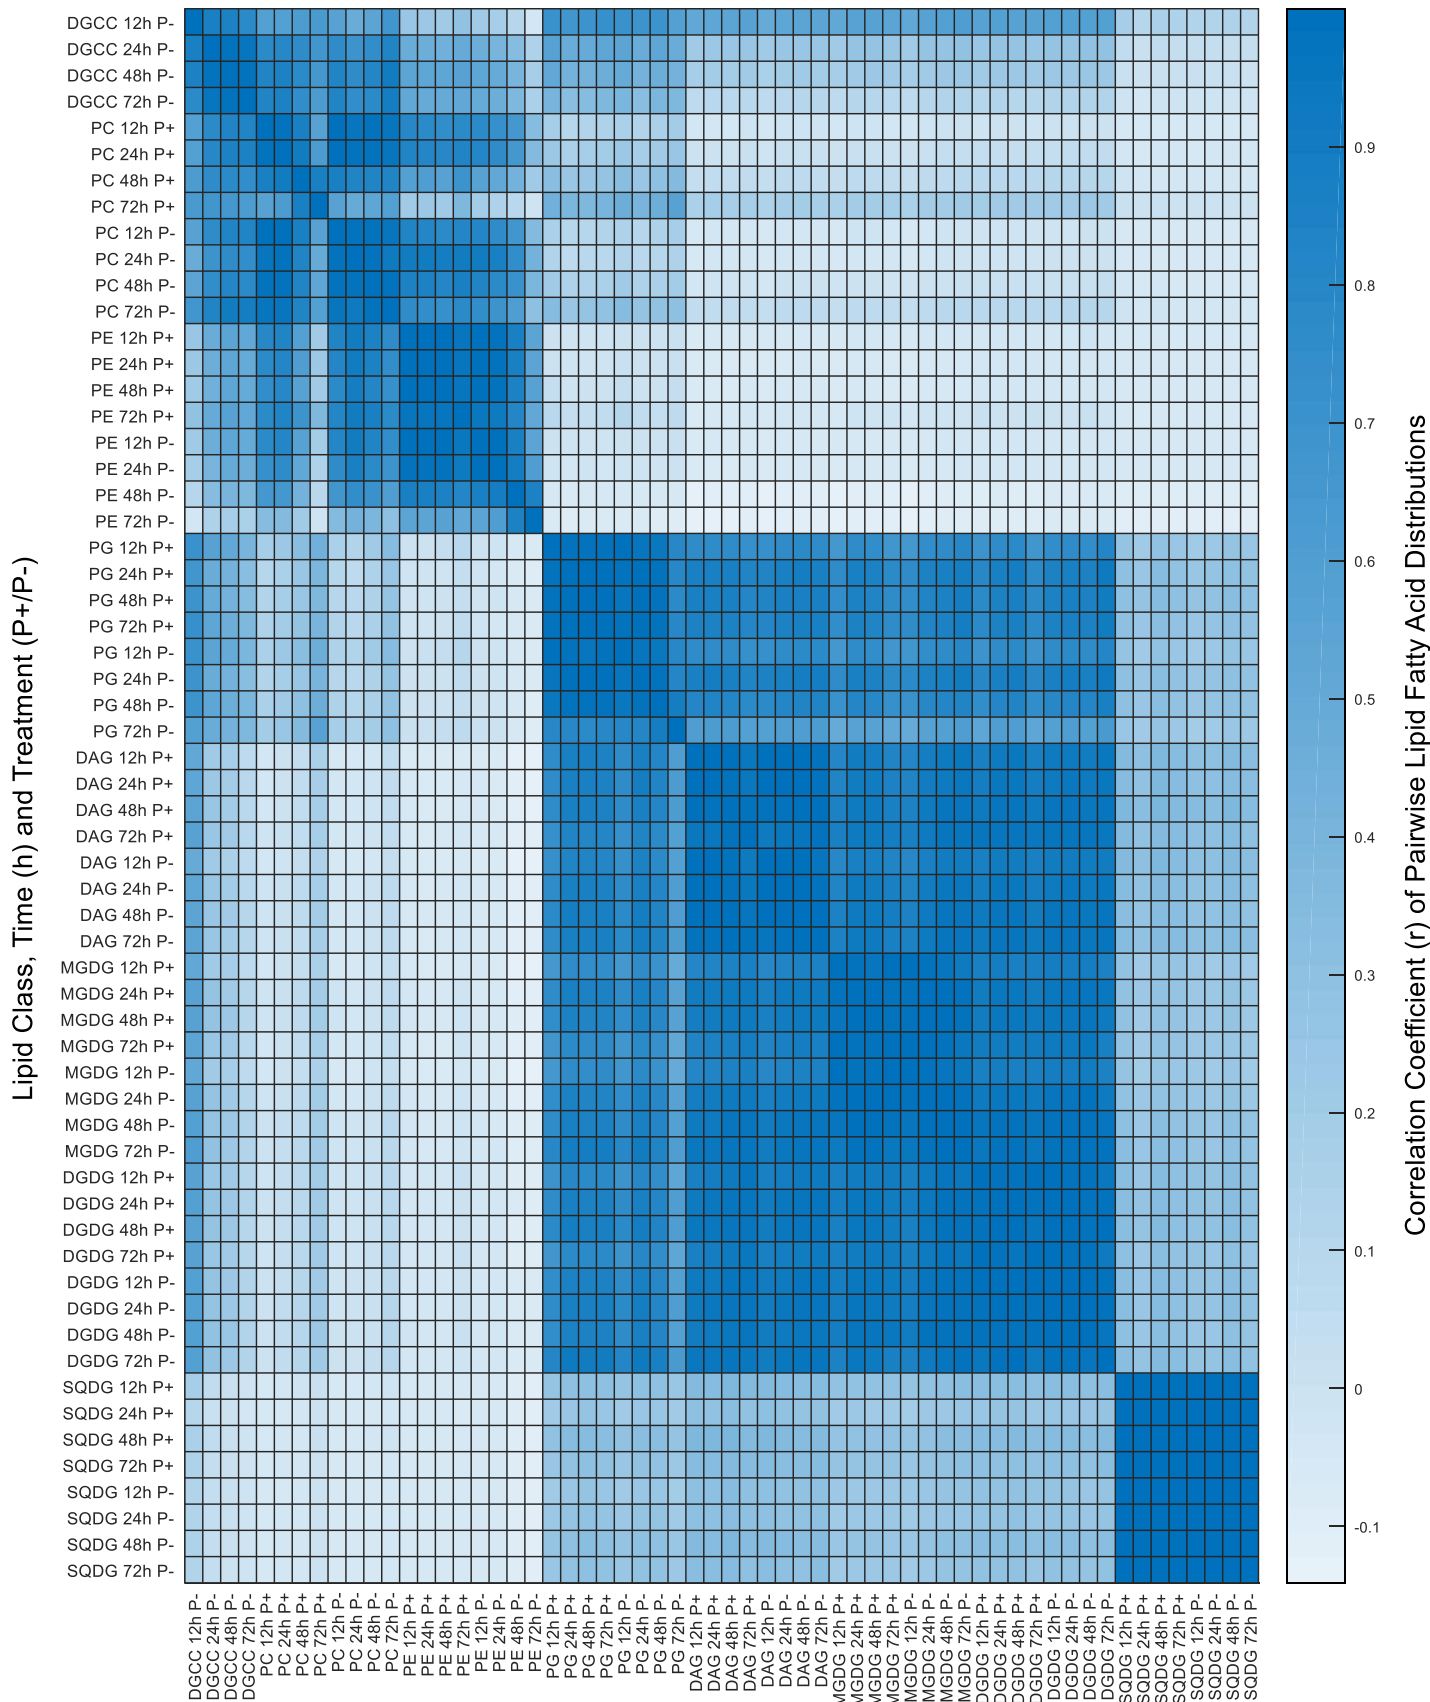

42

Lipid Class, Time (h) and Treatment (P+/P-)

43

44 *Supplementary Figure 3: Heatmap of correlation coefficients ( $r$ ) from pairwise comparisons*  
45 *between different lipid classes at each time point (between 12 and 72 h) and each treatment*  
46 *( $P+$  and  $P-$ ), as a measure of fatty acid compositional similarity. The correlation coefficients*  
47 *were calculated from percentage relative abundances of each individual lipid species. As the %*  
48 *relative abundances sum to 100 in both cases, the fatty acyl similarity of a pair can be simply*  
49 *assessed upon  $r$ . Data are the mean of  $n = 3$  biological replicates.*

50

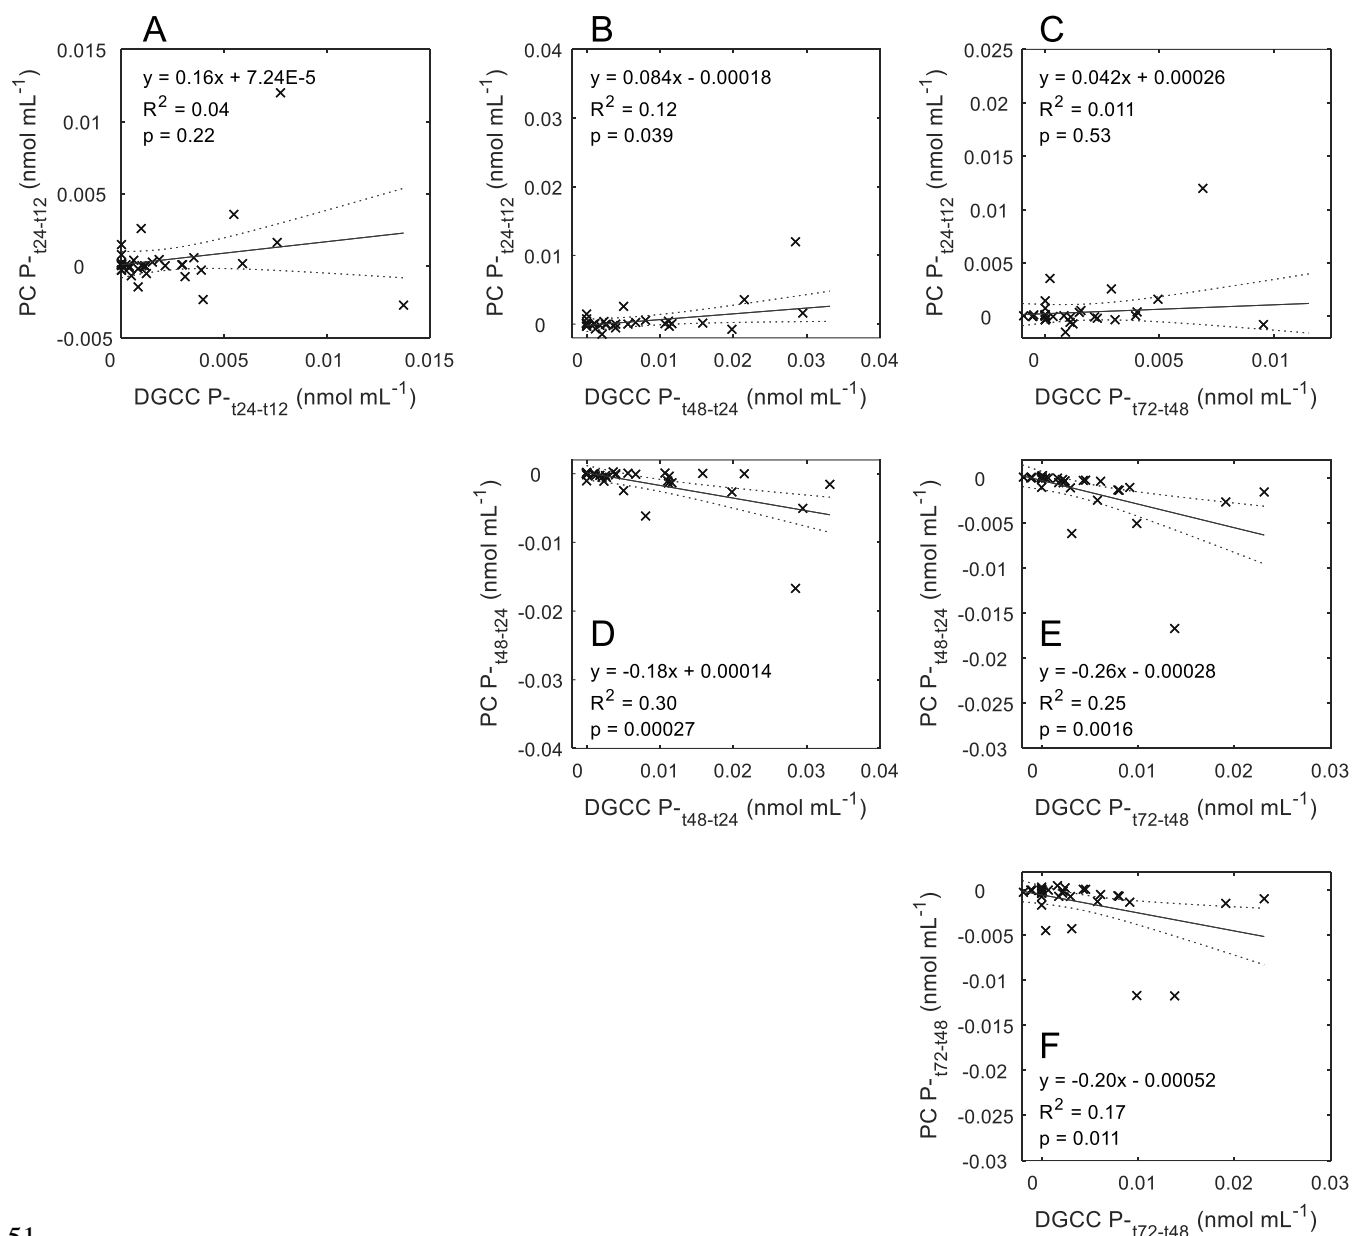

51

52 *Supplementary Figure 4 – Pairwise regression analysis of PC degradation and DGCC*  
 53 *synthesis, per mL culture volume, between subsequent time points from 12 to 72 h. Data*  
 54 *points are individual lipid species, of the same fatty acid composition, between the two lipid*  
 55 *classes. This analysis was performed to look for evidence of the recycling of diacylglyceride*  
 56 *substructures, liberated by the degradative breakdown of PC and funnelled into the synthesis*  
 57 *of the substitute lipid DGCC. Such a relationship would be evident here as a significant*  
 58 *anticorrelation, as observed in the DGCC P-<sub>t48-t24</sub>/PC P-<sub>t48-t24</sub>; DGCC P-<sub>t72-t48</sub>/PC P-<sub>t48-t24</sub>;*  
 59 *and DGCC P-<sub>t72-t48</sub>/PC P-<sub>t72-t48</sub> cases (panels D, E, and F). Data are the mean of n = 3*

60 *biological replicates. The dashed lines represent the 95% confidence bounds of the linear*  
61 *regression model.*

62

63

64



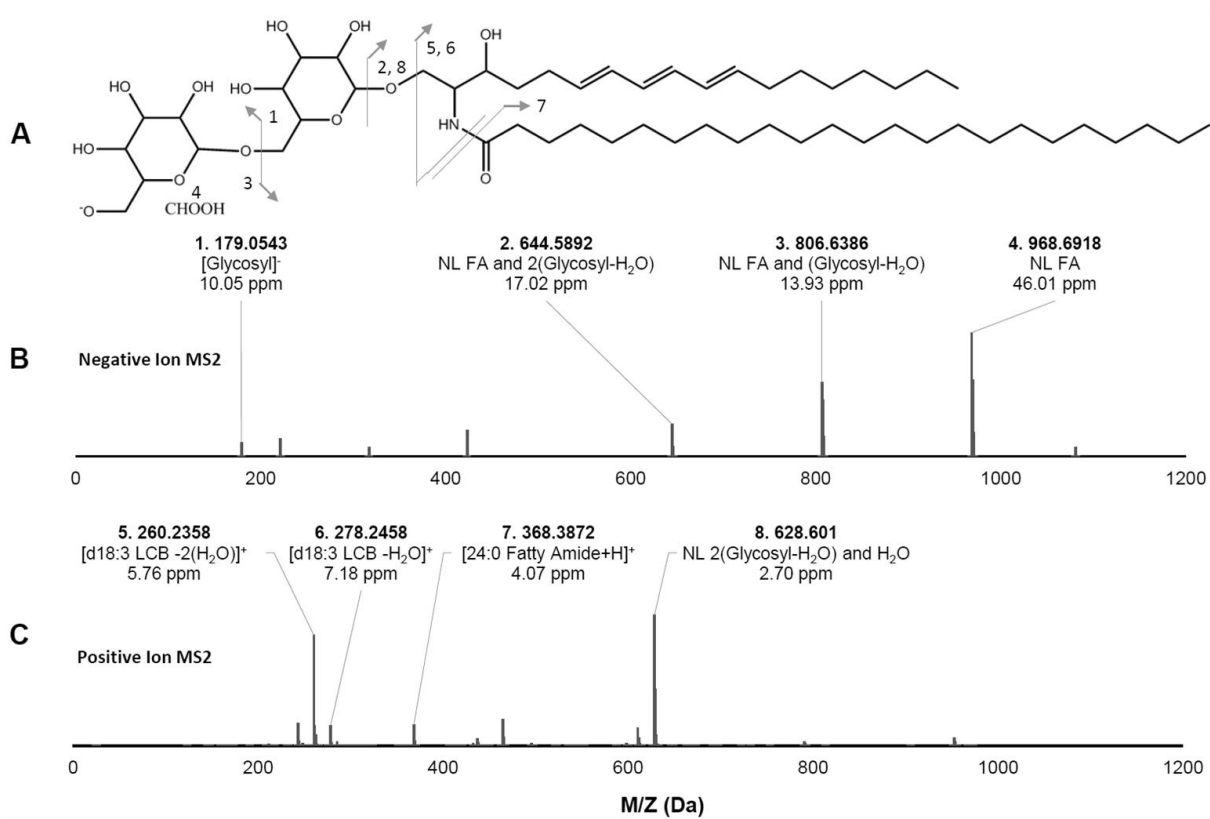

66

67

68 *Supplementary Figure 5 - Chemical structure assignment of (Gly)<sub>2</sub>Cer(d18:3/24:0) (A) and*  
 69 *supporting MS2 fragmentation data in negative (B) and positive (C) ion mode. Spectra from*  
 70 *a single representative P- sample. Hydroxyl group and unsaturation regio- and*  
 71 *stereochemistry was not resolved. Arrows indicate fragmentation and the direction of the*  
 72 *charged ion position. The negative ion MS2 (B) revealed fragment ions of 968.6918,*  
 73 *806.6386, 644.5892 and 179.0543 Da, corresponding to a neutral loss of the formic acid*  
 74 *(CHOOH) adduct, neutral loss of CHOOH and a glycosyl-H<sub>2</sub>O, neutral loss of CHOOH and*  
 75 *two glycosyl-H<sub>2</sub>O units and a glycosyl fragment respectively. Knowledge of the CHOOH*  
 76 *adduct and the retention time was used to identify the [M+H]<sup>+</sup> equivalent in positive ion*  
 77 *mode and its respective MS2 fragmentation spectrum. In positive ion mode (C), MS2*  
 78 *fragment ions of 628.6010, 368.3872, 278.2458 and 260.2358 corresponded to a neutral loss*

79 *of two glycosyl moieties, a 24:0 fatty amide fragment ion and a d18:3 long chain base minus*  
80 *one and two H<sub>2</sub>O respectively.*

**(A)**  
Positive

Database Assignment and Corroborating MS2 Evidence:

| MZ (Da)  | R.T. | P Val.   | P+   | P-   | Adduct                            | Assignment          | PPM Diff. | MS2 Fragments                       |
|----------|------|----------|------|------|-----------------------------------|---------------------|-----------|-------------------------------------|
| 774.5897 | 11.5 | 1.04E-05 | 0.00 | 1.00 | (M+H) <sup>+</sup>                | DGCC(20:5/16:0)     | 2.39      | D184, 20:5 and 16:0 NL Fatty Ketene |
| 536.3573 | 5.0  | 2.19E-03 | 0.00 | 1.00 | (M+H) <sup>+</sup>                | LDGCC(20:5)         | -1.57     | D104, 20:5 NL Fatty Ketene          |
| 800.6057 | 11.9 | 5.98E-05 | 0.00 | 1.00 | (M+H) <sup>+</sup>                | DGCC(22:6/16:0)     | 2.71      | D104, 22:6 and 16:0 NL Fatty Ketene |
| 562.3729 | 5.4  | 8.74E-03 | 0.00 | 1.00 | (M+H) <sup>+</sup>                | LDGCC(22:6)         | -1.65     | D104, 22:6 NL Fatty Ketene          |
| 820.5735 | 10.6 | 1.02E-04 | 0.00 | 1.00 | (M+H) <sup>+</sup>                | DGCC(20:5/20:5)     | 1.59      | D104, 20:5 NL Fatty Ketene          |
| 846.5897 | 11.0 | 1.48E-04 | 0.00 | 1.00 | (M+H) <sup>+</sup>                | DGCC(22:6/20:5)     | 2.20      | D104, 22:6 NL Fatty Ketene          |
| 772.5719 | 10.8 | 2.91E-03 | 0.00 | 1.00 | (M+H) <sup>+</sup>                | DGCC(20:5/16:1)     | -0.32     | D104, 20:5 NL Fatty Ketene          |
| 748.5718 | 11.0 | 1.81E-03 | 0.00 | 1.00 | (M+H) <sup>+</sup>                | DGCC(18:4/16:0)     | -0.50     | D104, 18:4 and 16:0 NL Fatty Ketene |
| 726.5891 | 11.7 | 8.79E-04 | 0.00 | 1.00 | (M+H) <sup>+</sup>                | DGCC(16:1/16:0)     | 1.68      | D104, 16:1 and 16:0 NL Fatty Ketene |
| 746.5589 | 10.5 | 2.22E-03 | 0.00 | 1.00 | (M+H) <sup>+</sup>                | DGCC(20:5/14:0)     | 3.10      | D104, 20:5 and 14:0 NL Fatty Ketene |
| 510.3410 | 4.8  | 9.59E-03 | 0.00 | 1.00 | (M+H) <sup>+</sup>                | LDGCC(18:4)         | -3.04     | D104, 18:4 NL Fatty Ketene          |
| 724.5720 | 11.1 | 4.12E-03 | 0.00 | 1.00 | (M+H) <sup>+</sup>                | DGCC(16:1/16:1)     | -0.20     | D104, 16:1 NL Fatty Ketene          |
| 796.7424 | 20.7 | 7.97E-04 | 0.00 | 1.00 | (M+NH <sub>4</sub> ) <sup>+</sup> | TAG(16:0/16:0/14:0) | 4.41      | 16:0 and 14:0 NL FA+NH <sub>3</sub> |
| 798.5871 | 11.1 | 1.03E-03 | 0.00 | 1.00 | (M+H) <sup>+</sup>                | DGCC(20:5/18:2)     | -0.96     | D104, 20:5 and 18:2 NL Fatty Ketene |
| 794.5575 | 10.1 | 2.88E-02 | 0.00 | 1.00 | (M+H) <sup>+</sup>                | DGCC(20:5/18:4)     | 1.23      | D104, 20:5 NL Fatty Ketene          |

**(B)**  
Negative

Database Assignment and Corroborating MS2 Evidence:

| MZ (Da)   | R.T. | P Val.   | P+   | P-   | Adduct                                | Assignment                         | PPM Diff. | MS2 Fragments                       |
|-----------|------|----------|------|------|---------------------------------------|------------------------------------|-----------|-------------------------------------|
| 818.5771  | 11.5 | 4.41E-04 | 0.00 | 1.00 | (M+HAc-CH <sub>3</sub> ) <sup>-</sup> | DGCC(20:5/16:0)                    | -2.18     | 20:5 and 16:0 FA Daughter Fragments |
| 844.5949  | 11.9 | 7.12E-04 | 0.00 | 1.00 | (M+HAc-CH <sub>3</sub> ) <sup>-</sup> | DGCC(22:6/16:0)                    | 0.49      | 22:6 and 16:0 FA Daughter Fragments |
| 890.5801  | 11.1 | 1.77E-04 | 0.00 | 1.00 | (M+HAc-CH <sub>3</sub> ) <sup>-</sup> | DGCC(22:6/20:5)                    | 1.42      | 20:5 FA Daughter Fragment           |
| 770.5778  | 11.6 | 1.87E-03 | 0.00 | 1.00 | (M+HAc-CH <sub>3</sub> ) <sup>-</sup> | DGCC(16:1/16:0)                    | -1.39     | 16:1 and 16:0 FA Daughter Fragments |
| 816.5621  | 10.8 | 2.20E-05 | 0.00 | 1.00 | (M+HAc-CH <sub>3</sub> ) <sup>-</sup> | DGCC(20:5/16:1)                    | -1.35     | 20:5 and 16:1 FA Daughter Fragments |
| 792.5624  | 11.1 | 4.49E-04 | 0.00 | 1.00 | (M+HAc-CH <sub>3</sub> ) <sup>-</sup> | DGCC(18:4/16:0)                    | -1.02     | 18:4 and 16:0 FA Daughter Fragments |
| 1174.7555 | 12.9 | 1.30E-05 | 0.00 | 1.00 |                                       | Unknown                            |           |                                     |
| 1014.7112 | 13.6 | 6.17E-03 | 0.00 | 1.00 | (M+FA-H) <sup>-</sup>                 | (Gly) <sub>2</sub> Cer(d18:3/24:0) | 1.34      | See Figure 3                        |
| 532.3505  | 5.1  | 4.67E-02 | 0.00 | 1.00 | (M+HAc-CH <sub>3</sub> ) <sup>-</sup> | LDGCC(16:1)                        | 2.49      | 16:1 FA Daughter Fragment           |
| 796.5931  | 11.9 | 3.46E-04 | 0.00 | 1.00 | (M+HAc-CH <sub>3</sub> ) <sup>-</sup> | DGCC(18:2/16:0)                    | -1.72     | 18:2 and 16:0 FA Daughter Fragments |
| 595.5395  | 12.7 | 4.14E-03 | 0.00 | 1.00 |                                       | Unknown                            |           |                                     |
| 838.5529  | 10.1 | 4.59E-03 | 0.00 | 1.00 | (M+HAc-CH <sub>3</sub> ) <sup>-</sup> | DGCC(20:5/18:4)                    | 6.38      | Coelution with Identified +ve Ion   |
| 623.5695  | 13.6 | 8.15E-03 | 0.14 | 0.86 |                                       | Unknown                            |           |                                     |
| 819.5296  | 11.3 | 3.72E-02 | 0.22 | 0.78 | (M-H) <sup>-</sup>                    | SQDG(34:1)                         | -0.26     | DB Match and Diagnostic R.T. Only   |
| 694.6305  | 15.4 | 1.28E-02 | 0.27 | 0.73 |                                       | Unknown                            |           |                                     |

81

82 *Supplementary Figure 6 - Untargeted screen of the T. pseudonana lipidome subject to P*

83 *stress. Detected ions were ranked based upon normalised differential abundance*

84  $(Quantity(P^-)/(Quantity(P^+) + Quantity(P^-)))$  therefore those at the top are most strongly  
85 increased subject to *P* stress. Panel A displays positive ions and Panel B displays negative  
86 ions. *R.T.* represents chromatographic retention time, *P* value was determined by unpaired,  
87 two sample equal variance *T*-test. Assignment represents the lipid identity, *PPM Diff.* the  
88 difference between the observed and predicted *M/Z*, and *MS<sup>2</sup>* fragments outlines the observed  
89 fragments under *AutoMS<sup>2</sup>* in support of the designated assignment. *L-* refers to a lyso-species  
90 (bearing 1 rather than 2 fatty acids), *NL* = neutral loss, *HAc* = Acetic Acid and *FA* = Formic  
91 Acid. Data represent the mean of biological triplicate samples. Assignments represent the  
92 primary fatty acyl configuration, as determined by the abundance of the fatty acyl fragments  
93 in the *MS<sup>2</sup>* spectra.

94
